# Supplementary material for: Prescription Patterns for Pulmonary Vasodilators in the Treatment of Pulmonary Hypertension Associated With Chronic Lung Diseases: Insights From a Clinician Survey
Source: Frontiers journal article supplement (doi:10.3389/fmed.2021.764815), 2021-12-03
Supplement: Data_Sheet_1.pdf [file Data_Sheet_1.pdf]

## Demographics

Dear colleague,

Welcome to the Group 3 Pulmonary Hypertension Treatment Survey. The purpose of this survey is to help us to better understand treatment practices for patients with lung disease and pulmonary hypertension. We will collect basic demographic data to better understand practice patterns of different clinicians, institutions and regions. The data will be kept completely anonymous.

This survey includes some demographic questions and 7 hypothetical cases. **It should take you less than 10 minutes.**

Each case will give you several treatment options: no medical therapy or single/double/triple agent therapy. Depending which option you choose, you will be asked to select a specific combination of therapies. Please do not include any individually identifiable information in your answers.

**You may have completed a prior version of this survey – please complete it again as we have updated the questions and cases.**

Participant's rights questions, contact 1-866-680-2906.

Abbreviations: Idiopathic pulmonary fibrosis (IPF); New York Heart Association (NYHA); forced vital capacity (FVC); forced expiratory volume in 1 second (FEV1); diffusing capacity of the lungs for carbon monoxide (DLCO); mean pulmonary artery pressure (mPAP); pulmonary vascular resistance (PVR); Wood Units (WU); pulmonary capillary wedge pressure (PCWP); cardiac index (CI); six minute walk distance (6MWD); maximal rate of oxygen consumption (VO<sub>2</sub> max); ventilation perfusion scan (V/Q scan); human immunodeficiency virus (HIV); intravenous (IV); subcutaneous (SC); right ventricle (RV); tricuspid regurgitation (TR); chronic obstructive pulmonary disease (COPD)

## **Block 1**

Which best describes your title?

☐ Attending physician / consultant

- ☐ Physician-in-training
- ☐ Nurse Practitioner
- ☐ Physician Assistant
- ☐ Other

Please describe your title

## Block 2

Which field best describes your training background?

- ☐ Pulmonary medicine
- ☐ Cardiovascular medicine
- ☐ Rheumatology
- ☐ Other

Please describe your training background

## Block 3

How many years have you been practicing after completion of your training program(s)?

## Block 4

Do you practice in the United States?

- ☐ Yes
- ☐ No

Which best describes the type of institution in which you practice primarily?

- ☐ Pulmonary Hypertension Center of Comprehensive Care
- ☐ Pulmonary Hypertension Regional Clinical Program
- ☐ Academic Center without PHA designation
- ☐ Community Practice without PHA designation
- ☐ Other

Please enter a brief description of your primary practice institution

## Block 5

Please enter the first three digits of the zip code in which you practice (this will be kept completely anonymous)

## Block 6

What percentage of your time do you spend practicing clinical medicine (i.e. not administration, research, etc.)?

0 10 20 30 40 50 60 70 80 90 100

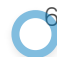

## Block 7

What percentage of your clinical practice is treating pulmonary hypertension patients?

0 10 20 30 40 50 60 70 80 90 100

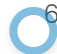

## Block 8

Approximately how many unique patients with group 3 pulmonary hypertension have you seen in the last year in your practice?

## Case 1 Block

## Case 2 Block

| Demographics                                                                                                   |                                                       | Right Heart Catheterization |                          |
|----------------------------------------------------------------------------------------------------------------|-------------------------------------------------------|-----------------------------|--------------------------|
| Age                                                                                                            | 58                                                    | mPAP                        | 31 mmHg                  |
| Sex                                                                                                            | Male                                                  | PVR                         | 4.1 WU                   |
| Disease                                                                                                        | Advanced IPF with extensive parenchymal involvement   | PCWP                        | 10 mmHg                  |
| WHO Functional Class                                                                                           | III                                                   | CI                          | 2.7 L/min/m <sup>2</sup> |
|                                                                                                                |                                                       |                             |                          |
| PFTs                                                                                                           |                                                       | Other Testing               |                          |
| FEV1/FVC ratio                                                                                                 | 0.78                                                  | 6MWD                        | 200 meters               |
| FVC (% predicted)                                                                                              | 50%                                                   | VO2 Max                     | 13 ml/min/kg             |
| DLCO (% predicted)                                                                                             | 47%                                                   | V/Q Scan                    | Low probability for PE   |
|                                                                                                                |                                                       | Autoimmune serologies       | Negative                 |
|                                                                                                                |                                                       | Kidney and liver function   | Normal                   |
| Echo                                                                                                           | normal biventricular size and function, normal valves | HIV                         | Negative                 |
| <p>What would be your initial therapeutic approach to treating the pulmonary hypertension in this patient?</p> |                                                       |                             |                          |

- ☐ No medical therapy  
☐ Single agent therapy  
☐ Double agent therapy  
☐ Triple agent therapy

Which single agent therapy would you choose?

- ☐ PDE5 inhibitor
- ☐ Endothelin receptor antagonist
- ☐ Oral prostacyclin analogue or receptor agonist
- ☐ Inhaled prostacyclin analogue
- ☐ IV/SQ prostacyclin analogue
- ☐ Riociguat

Which double agent therapy combination would you choose?

- ☐ PDE5 inhibitor + endothelin receptor antagonist
- ☐ PDE5 inhibitor + oral prostacyclin analogue or receptor agonist
- ☐ PDE5 inhibitor + inhaled prostacyclin analogue
- ☐ PDE5 inhibitor + IV/SQ prostacyclin analogue
- ☐ Endothelin receptor antagonist + oral prostacyclin analogue or receptor agonist
- ☐ Endothelin receptor antagonist + inhaled prostacyclin analogue
- ☐ Endothelin receptor antagonist + IV/SQ prostacyclin analogue
- ☐ Endothelin receptor antagonist + riociguat
- ☐ Oral prostacyclin analogue or receptor agonist + riociguat
- ☐ Inhaled prostacyclin analogue + riociguat
- ☐ IV/SQ prostacyclin analogue + riociguat

Which triple agent therapy combination would you choose?

- ☐ PDE5 inhibitor + endothelin receptor antagonist + oral prostacyclin analogue or receptor agonist
- ☐ PDE5 inhibitor + endothelin receptor antagonist + inhaled prostacyclin analogue
- ☐ PDE5 inhibitor + endothelin receptor antagonist + IV/SQ prostacyclin analogue
- ☐ Riociguat + endothelin receptor antagonist + oral prostacyclin analogue or receptor agonist
- ☐ Riociguat + endothelin receptor antagonist + inhaled prostacyclin analogue
- ☐ Riociguat + endothelin receptor antagonist + IV/SQ prostacyclin analogue

## Case 3 Block

| Demographics                                                                                                          |                                                                                                           | Right Heart Catheterization |                          |
|-----------------------------------------------------------------------------------------------------------------------|-----------------------------------------------------------------------------------------------------------|-----------------------------|--------------------------|
| Age                                                                                                                   | 61                                                                                                        | mPAP                        | 39 mmHg                  |
| Sex                                                                                                                   | Female                                                                                                    | PVR                         | 8.75 WU                  |
| Disease                                                                                                               | Mild IPF with limited parenchymal involvement                                                             | PCWP                        | 11 mmHg                  |
| WHO Functional Class                                                                                                  | III                                                                                                       | CI                          | 2.0 L/min/m <sup>2</sup> |
|                                                                                                                       |                                                                                                           |                             |                          |
| PFTs                                                                                                                  |                                                                                                           | Other Testing               |                          |
| FEV1/FVC ratio                                                                                                        | 0.73                                                                                                      | 6MWD                        | 300 meters               |
| FVC (% predicted)                                                                                                     | 85%                                                                                                       | VO2 Max                     | 14 ml/min/kg             |
| DLCO (% predicted)                                                                                                    | 35%                                                                                                       | V/Q Scan                    | Low probability for PE   |
|                                                                                                                       |                                                                                                           | Autoimmune serologies       | Negative                 |
|                                                                                                                       |                                                                                                           | Kidney and liver function   | Normal                   |
| Echo                                                                                                                  | moderate RV dilation with reduced systolic function, normal left sided size and function, and moderate TR | HIV                         | Negative                 |
| <p><b>What would be your initial therapeutic approach to treating the pulmonary hypertension in this patient?</b></p> |                                                                                                           |                             |                          |

- ☐ No medical therapy

- ☐ Single agent therapy
- ☐ Double agent therapy
- ☐ Triple agent therapy

Which single agent therapy would you choose?

- ☐ PDE5 inhibitor
- ☐ Endothelin receptor antagonist
- ☐ Oral prostacyclin analogue or receptor agonist
- ☐ Inhaled prostacyclin analogue
- ☐ IV/SQ prostacyclin analogue
- ☐ Riociguat

Which double agent therapy combination would you choose?

- ☐ PDE5 inhibitor + endothelin receptor antagonist
- ☐ PDE5 inhibitor + oral prostacyclin analogue or receptor agonist
- ☐ PDE5 inhibitor + inhaled prostacyclin analogue
- ☐ PDE5 inhibitor + IV/SQ prostacyclin analogue
- ☐ Endothelin receptor antagonist + oral prostacyclin analogue or receptor agonist
- ☐ Endothelin receptor antagonist + inhaled prostacyclin analogue
- ☐ Endothelin receptor antagonist + IV/SQ prostacyclin analogue
- ☐ Endothelin receptor antagonist + riociguat

- ☐ Oral prostacyclin analogue or receptor agonist + riociguat
- ☐ Inhaled prostacyclin analogue + riociguat
- ☐ IV/SQ prostacyclin analogue + riociguat

Which triple agent therapy combination would you choose?

- ☐ PDE5 inhibitor + endothelin receptor antagonist + oral prostacyclin analogue or receptor agonist
- ☐ PDE5 inhibitor + endothelin receptor antagonist + inhaled prostacyclin analogue
- ☐ PDE5 inhibitor + endothelin receptor antagonist + IV/SQ prostacyclin analogue
- ☐ Riociguat + endothelin receptor antagonist + oral prostacyclin analogue or receptor agonist
- ☐ Riociguat + endothelin receptor antagonist + inhaled prostacyclin analogue
- ☐ Riociguat + endothelin receptor antagonist + IV/SQ prostacyclin analogue

## Case 4 Block

| Demographics                                                                                                          |                                                                                                         | Right Heart Catheterization |                          |
|-----------------------------------------------------------------------------------------------------------------------|---------------------------------------------------------------------------------------------------------|-----------------------------|--------------------------|
| Age                                                                                                                   | 57                                                                                                      | mPAP                        | 46 mmHg                  |
| Sex                                                                                                                   | Male                                                                                                    | PVR                         | 10.3 WU                  |
| Disease                                                                                                               | Advanced IPF with extensive parenchymal involvement                                                     | PCWP                        | 9 mmHg                   |
| WHO Functional Class                                                                                                  | III                                                                                                     | CI                          | 1.9 L/min/m <sup>2</sup> |
|                                                                                                                       |                                                                                                         |                             |                          |
| PFTs                                                                                                                  |                                                                                                         | Other Testing               |                          |
| FEV1/FVC ratio                                                                                                        | 0.74                                                                                                    | 6MWD                        | 150 meters               |
| FVC (% predicted)                                                                                                     | 45%                                                                                                     | VO2 Max                     | 9 ml/min/kg              |
| DLCO (% predicted)                                                                                                    | 22%                                                                                                     | V/Q Scan                    | Low probability for PE   |
|                                                                                                                       |                                                                                                         | Autoimmune serologies       | Negative                 |
|                                                                                                                       |                                                                                                         | Kidney and liver function   | Normal                   |
| Echo                                                                                                                  | moderate RV dilation with reduced systolic function, severe TR, and normal left sided size and function | HIV                         | Negative                 |
| <p><b>What would be your initial therapeutic approach to treating the pulmonary hypertension in this patient?</b></p> |                                                                                                         |                             |                          |

- ☐ No medical therapy  
☐ Single agent therapy  
☐ Double agent therapy  
☐ Triple agent therapy

Which single agent therapy would you choose?

- ☐ PDE5 inhibitor  
☐ Endothelin receptor antagonist  
☐ Oral prostacyclin analogue or receptor agonist  
☐ Inhaled prostacyclin analogue  
☐ IV/SQ prostacyclin analogue  
☐ Riociguat

Which double agent therapy combination would you choose?

- ☐ PDE5 inhibitor + endothelin receptor antagonist
- ☐ PDE5 inhibitor + oral prostacyclin analogue or receptor agonist
- ☐ PDE5 inhibitor + inhaled prostacyclin analogue
- ☐ PDE5 inhibitor + IV/SQ prostacyclin analogue
- ☐ Endothelin receptor antagonist + oral prostacyclin analogue or receptor agonist
- ☐ Endothelin receptor antagonist + inhaled prostacyclin analogue
- ☐ Endothelin receptor antagonist + IV/SQ prostacyclin analogue
- ☐ Endothelin receptor antagonist + riociguat
- ☐ Oral prostacyclin analogue or receptor agonist + riociguat
- ☐ Inhaled prostacyclin analogue + riociguat
- ☐ IV/SQ prostacyclin analogue + riociguat

Which triple agent therapy combination would you choose?

- ☐ PDE5 inhibitor + endothelin receptor antagonist + oral prostacyclin analogue or receptor agonist
- ☐ PDE5 inhibitor + endothelin receptor antagonist + inhaled prostacyclin analogue
- ☐ PDE5 inhibitor + endothelin receptor antagonist + IV/SQ prostacyclin analogue
- ☐ Riociguat + endothelin receptor antagonist + oral prostacyclin analogue or receptor agonist

- ☐ Riociguat + endothelin receptor antagonist + inhaled prostacyclin analogue
- ☐ Riociguat + endothelin receptor antagonist + IV/SQ prostacyclin analogue

## Case 5 Block

| Demographics                                                                                                   |                                                       | Right Heart Catheterization |                          |
|----------------------------------------------------------------------------------------------------------------|-------------------------------------------------------|-----------------------------|--------------------------|
| Age                                                                                                            | 62                                                    | mPAP                        | 31 mmHg                  |
| Sex                                                                                                            | Female                                                | PVR                         | 5.0 WU                   |
| Disease                                                                                                        | Mild COPD                                             | PCWP                        | 8 mmHg                   |
| WHO Functional Class                                                                                           | II                                                    | CI                          | 2.9 L/min/m <sup>2</sup> |
|                                                                                                                |                                                       |                             |                          |
| PFTs                                                                                                           |                                                       | Other Testing               |                          |
| FEV1/FVC ratio                                                                                                 | 0.62                                                  | 6MWD                        | 550 meters               |
| FEV1 (% predicted)                                                                                             | 59%                                                   | VO2 Max                     | 18 ml/min/kg             |
| FVC (% predicted)                                                                                              | 81%                                                   | V/Q Scan                    | Low probability for PE   |
| DLCO (% predicted)                                                                                             | 65%                                                   | Autoimmune serologies       | Negative                 |
| Echo                                                                                                           | normal biventricular size and function, normal valves | Kidney and liver function   | Normal                   |
|                                                                                                                |                                                       | HIV                         | Negative                 |
| <p>What would be your initial therapeutic approach to treating the pulmonary hypertension in this patient?</p> |                                                       |                             |                          |

- ☐ No medical therapy
- ☐ Single agent therapy
- ☐ Double agent therapy
- ☐ Triple agent therapy

Which single agent therapy would you choose?

- ☐ PDE5 inhibitor
- ☐ Endothelin receptor antagonist
- ☐ Oral prostacyclin analogue or receptor agonist
- ☐ Inhaled prostacyclin analogue
- ☐ IV/SQ prostacyclin analogue
- ☐ Riociguat

Which double agent therapy combination would you choose?

- ☐ PDE5 inhibitor + endothelin receptor antagonist
- ☐ PDE5 inhibitor + oral prostacyclin analogue or receptor agonist
- ☐ PDE5 inhibitor + inhaled prostacyclin analogue
- ☐ PDE5 inhibitor + IV/SQ prostacyclin analogue
- ☐ Endothelin receptor antagonist + oral prostacyclin analogue or receptor agonist
- ☐ Endothelin receptor antagonist + inhaled prostacyclin analogue
- ☐ Endothelin receptor antagonist + IV/SQ prostacyclin analogue
- ☐ Endothelin receptor antagonist + riociguat
- ☐ Oral prostacyclin analogue or receptor agonist + riociguat
- ☐ Inhaled prostacyclin analogue + riociguat
- ☐ IV/SQ prostacyclin analogue + riociguat

Which triple agent therapy combination would you choose?

- ☐ PDE5 inhibitor + endothelin receptor antagonist + oral prostacyclin analogue or receptor agonist
- ☐ PDE5 inhibitor + endothelin receptor antagonist + inhaled prostacyclin analogue
- ☐ PDE5 inhibitor + endothelin receptor antagonist + IV/SQ prostacyclin analogue
- ☐ Riociguat + endothelin receptor antagonist + oral prostacyclin analogue or receptor agonist
- ☐ Riociguat + endothelin receptor antagonist + inhaled prostacyclin analogue
- ☐ Riociguat + endothelin receptor antagonist + IV/SQ prostacyclin analogue

## Case 6 Block

| Demographics         |                                                                                                           | Right Heart Catheterization |                          |
|----------------------|-----------------------------------------------------------------------------------------------------------|-----------------------------|--------------------------|
| Age                  | 53                                                                                                        | mPAP                        | 45 mmHg                  |
| Sex                  | Male                                                                                                      | PVR                         | 9.2 WU                   |
| Disease              | Mild COPD                                                                                                 | PCWP                        | 10 mmHg                  |
| WHO Functional Class | III                                                                                                       | CI                          | 2.0 L/min/m <sup>2</sup> |
|                      |                                                                                                           |                             |                          |
| PFTs                 |                                                                                                           | Other Testing               |                          |
| FEV1/FVC ratio       | 0.59                                                                                                      | 6MWD                        | 275 meters               |
| FEV1 (% predicted)   | 63%                                                                                                       | VO2 Max                     | 14 ml/min/kg             |
| FVC (% predicted)    | 91%                                                                                                       | V/Q Scan                    | Low probability for PE   |
| DLCO (% predicted)   | 38%                                                                                                       | Autoimmune serologies       | Negative                 |
| Echo                 | moderate RV dilation with reduced systolic function, normal left sided size and function, and moderate TR | Kidney and liver function   | Normal                   |
|                      |                                                                                                           | HIV                         | Negative                 |

**What would be your initial therapeutic approach to treating the pulmonary hypertension in this patient?**

- ☐ No medical therapy

- ☐ Single agent therapy
- ☐ Double agent therapy
- ☐ Triple agent therapy

Which single agent therapy would you choose?

- ☐ PDE5 inhibitor
- ☐ Endothelin receptor antagonist
- ☐ Oral prostacyclin analogue or receptor agonist
- ☐ Inhaled prostacyclin analogue
- ☐ IV/SQ prostacyclin analogue
- ☐ Riociguat

Which double agent therapy combination would you choose?

- ☐ PDE5 inhibitor + endothelin receptor antagonist
- ☐ PDE5 inhibitor + oral prostacyclin analogue or receptor agonist
- ☐ PDE5 inhibitor + inhaled prostacyclin analogue
- ☐ PDE5 inhibitor + IV/SQ prostacyclin analogue
- ☐ Endothelin receptor antagonist + oral prostacyclin analogue or receptor agonist
- ☐ Endothelin receptor antagonist + inhaled prostacyclin analogue
- ☐ Endothelin receptor antagonist + IV/SQ prostacyclin analogue
- ☐ Endothelin receptor antagonist + riociguat

- ☐ Oral prostacyclin analogue or receptor agonist + riociguat
- ☐ Inhaled prostacyclin analogue + riociguat
- ☐ IV/SQ prostacyclin analogue + riociguat

Which triple agent therapy combination would you choose?

- ☐ PDE5 inhibitor + endothelin receptor antagonist + oral prostacyclin analogue or receptor agonist
- ☐ PDE5 inhibitor + endothelin receptor antagonist + inhaled prostacyclin analogue
- ☐ PDE5 inhibitor + endothelin receptor antagonist + IV/SQ prostacyclin analogue
- ☐ Riociguat + endothelin receptor antagonist + oral prostacyclin analogue or receptor agonist
- ☐ Riociguat + endothelin receptor antagonist + inhaled prostacyclin analogue
- ☐ Riociguat + endothelin receptor antagonist + IV/SQ prostacyclin analogue

## Case 7 Block

| Demographics         |                                                                                                       | Right Heart Catheterization |                          |
|----------------------|-------------------------------------------------------------------------------------------------------|-----------------------------|--------------------------|
| Age                  | 66                                                                                                    | mPAP                        | 59 mmHg                  |
| Sex                  | Female                                                                                                | PVR                         | 16.1 WU                  |
| Disease              | Severe COPD                                                                                           | PCWP                        | 10 mmHg                  |
| WHO Functional Class | III                                                                                                   | CI                          | 1.9 L/min/m <sup>2</sup> |
|                      |                                                                                                       |                             |                          |
| PFTs                 |                                                                                                       | Other Testing               |                          |
| FEV1/FVC ratio       | 0.42                                                                                                  | 6MWD                        | 200 meters               |
| FEV1 (% predicted)   | 29%                                                                                                   | VO2 Max                     | 9 ml/min/kg              |
| FVC (% predicted)    | 71%                                                                                                   | V/Q Scan                    | Low probability for PE   |
| DLCO (% predicted)   | 31%                                                                                                   | Autoimmune serologies       | Negative                 |
| Echo                 | severe RV dilation with reduced systolic function, severe TR, and normal left sided size and function | Kidney and liver function   | Normal                   |
|                      |                                                                                                       | HIV                         | Negative                 |

**What would be your initial therapeutic approach to treating the pulmonary hypertension in this patient?**

- ☐ No medical therapy
- ☐ Single agent therapy
- ☐ Double agent therapy
- ☐ Triple agent therapy

Which single agent therapy would you choose?

- ☐ PDE5 inhibitor
- ☐ Endothelin receptor antagonist
- ☐ Oral prostacyclin analogue or receptor agonist
- ☐ Inhaled prostacyclin analogue
- ☐ IV/SQ prostacyclin analogue
- ☐ Riociguat

Which double agent therapy combination would you choose?

- ☐ PDE5 inhibitor + endothelin receptor antagonist
- ☐ PDE5 inhibitor + oral prostacyclin analogue or receptor agonist
- ☐ PDE5 inhibitor + inhaled prostacyclin analogue
- ☐ PDE5 inhibitor + IV/SQ prostacyclin analogue
- ☐ Endothelin receptor antagonist + oral prostacyclin analogue or receptor agonist
- ☐ Endothelin receptor antagonist + inhaled prostacyclin analogue
- ☐ Endothelin receptor antagonist + IV/SQ prostacyclin analogue
- ☐ Endothelin receptor antagonist + riociguat
- ☐ Oral prostacyclin analogue or receptor agonist + riociguat
- ☐ Inhaled prostacyclin analogue + riociguat
- ☐ IV/SQ prostacyclin analogue + riociguat

Which triple agent therapy combination would you choose?

- ☐ PDE5 inhibitor + endothelin receptor antagonist + oral prostacyclin analogue or receptor agonist
- ☐ PDE5 inhibitor + endothelin receptor antagonist + inhaled prostacyclin analogue
- ☐ PDE5 inhibitor + endothelin receptor antagonist + IV/SQ prostacyclin analogue
- ☐ Riociguat + endothelin receptor antagonist + oral prostacyclin analogue or receptor agonist

- ☐ Riociguat + endothelin receptor antagonist + inhaled prostacyclin analogue
- ☐ Riociguat + endothelin receptor antagonist + IV/SQ prostacyclin analogue

Powered by Qualtrics
